# Supplementary material for: TOGGLE: toolbox for generic NGS analyses
Source: Springer Nature journal article supplement (doi:10.1186/s12859-015-0795-6), 2015-11-09
Supplement: 12859_2015_795_MOESM1_ESM.pdf [file 12859_2015_795_MOESM1_ESM.pdf]

pairing::pairer

paired

no paired

pairAnalysis.pl

singleAnalysis.pl

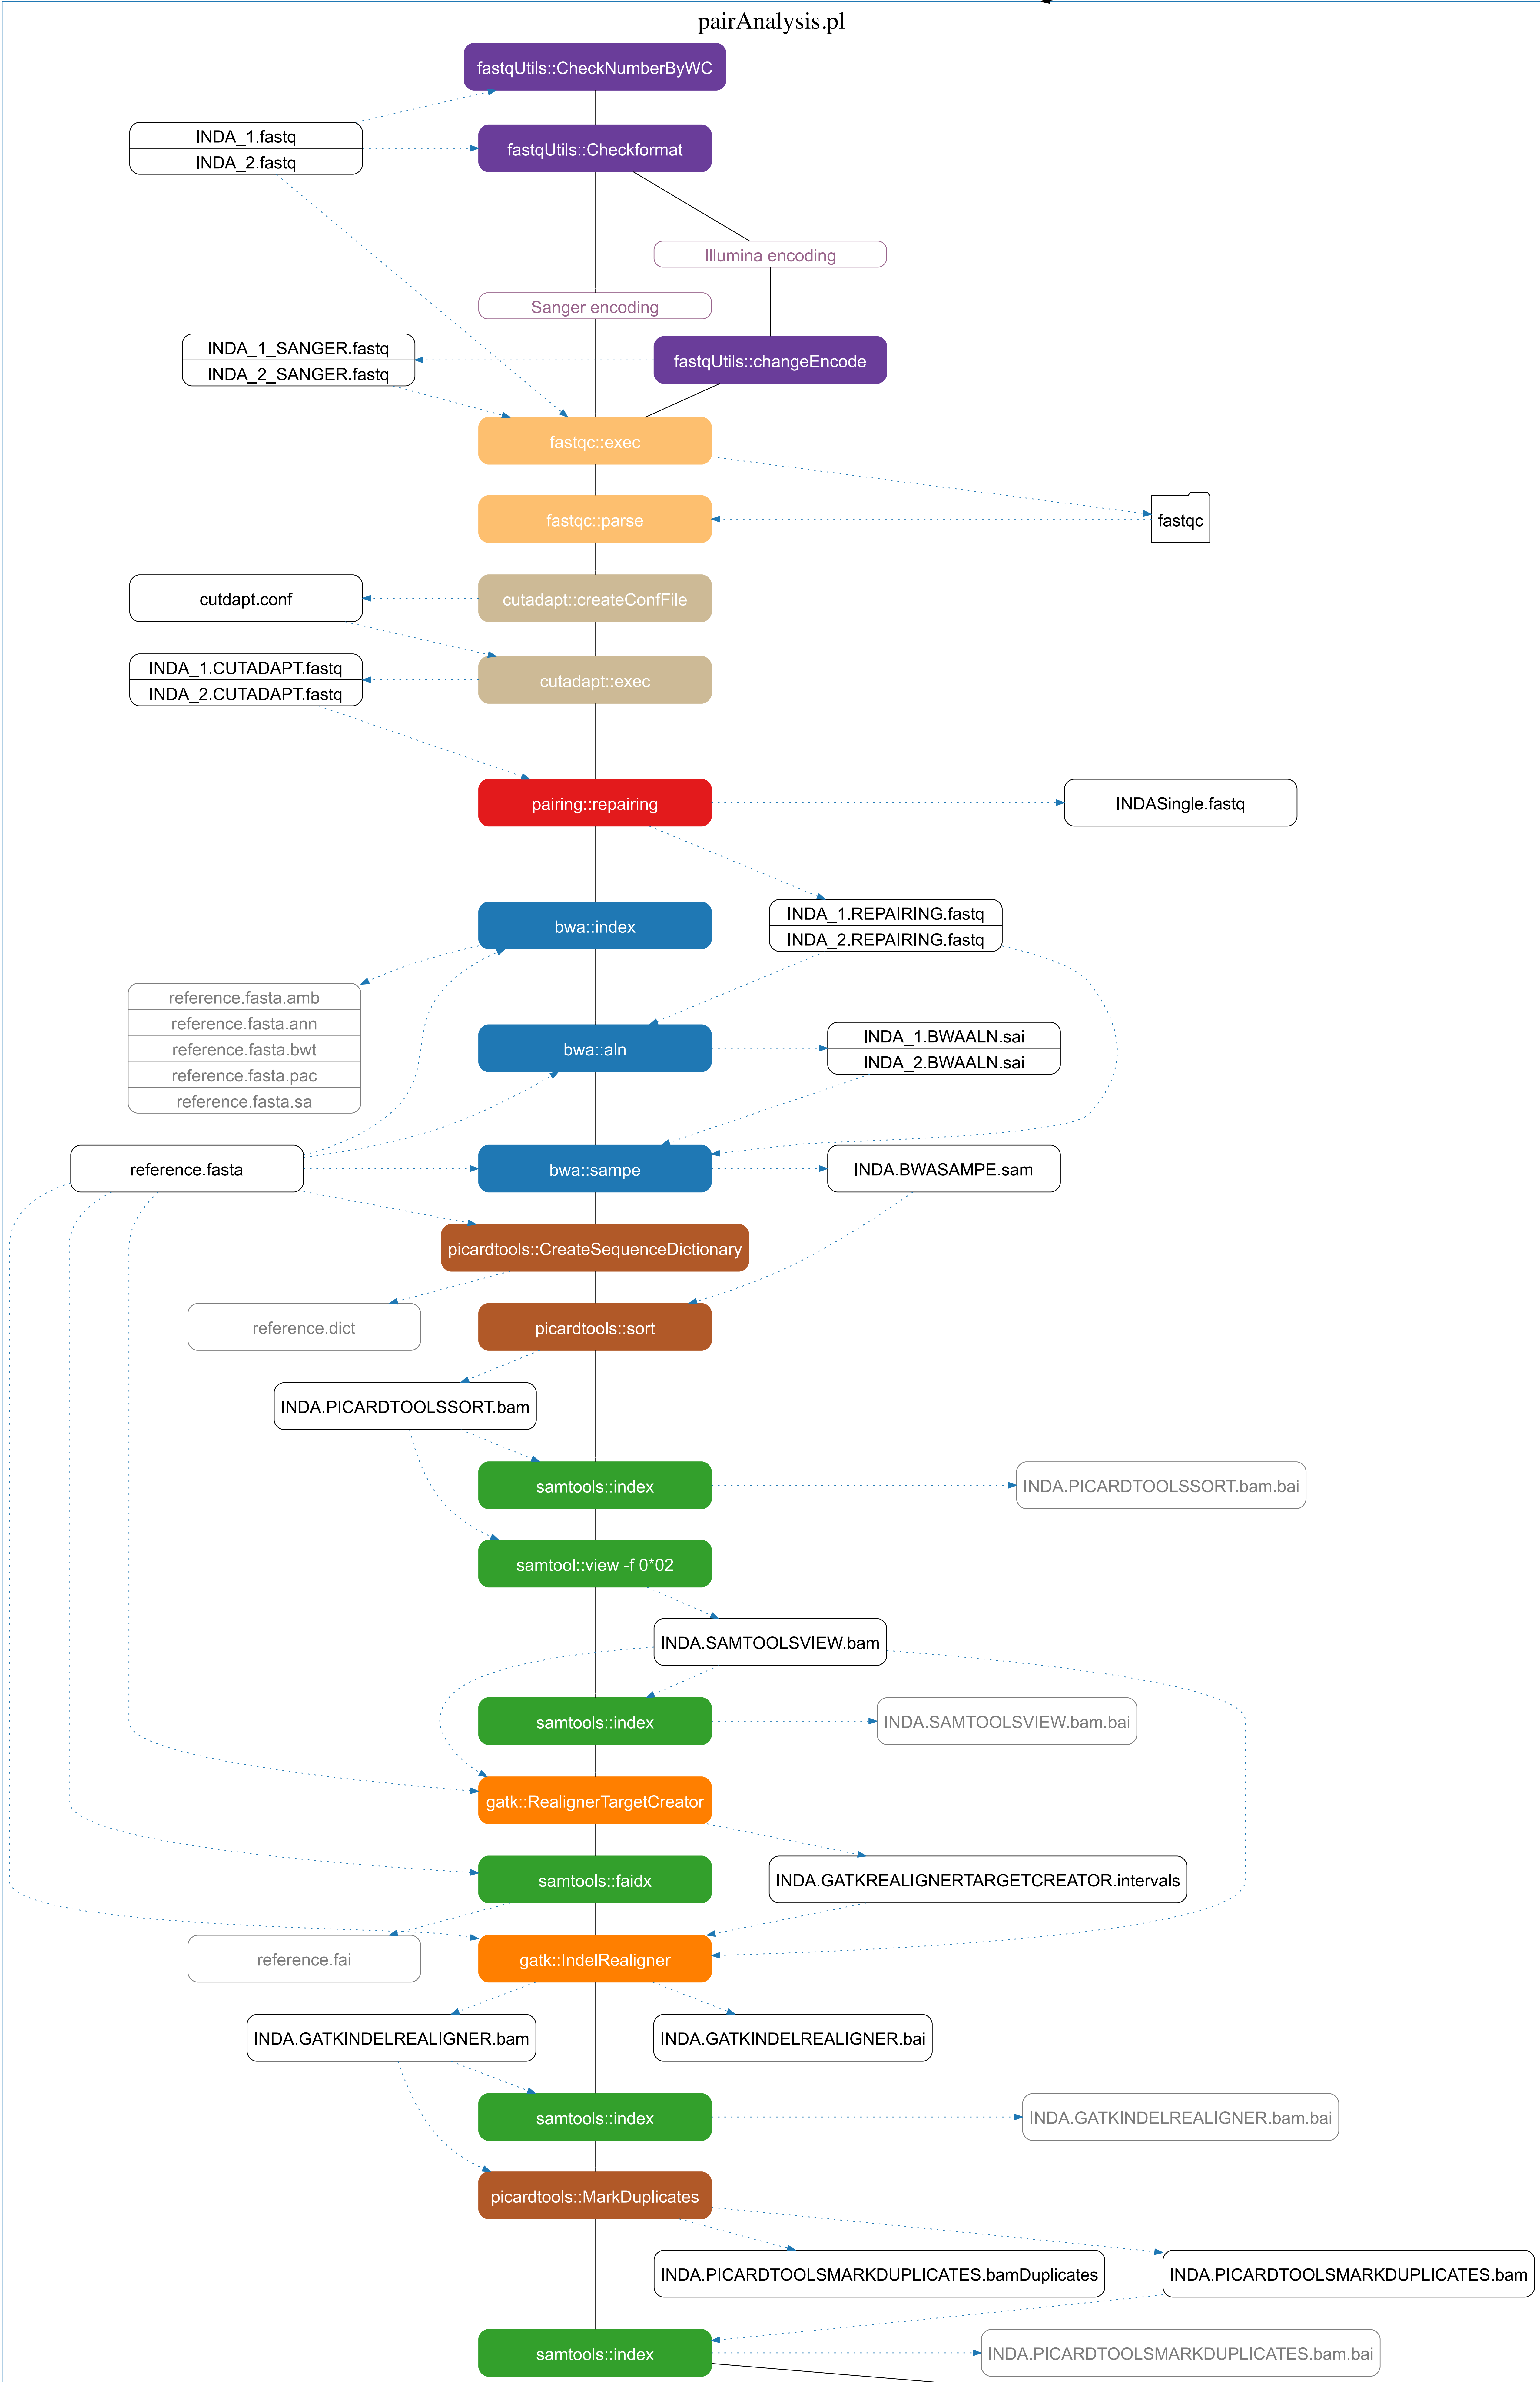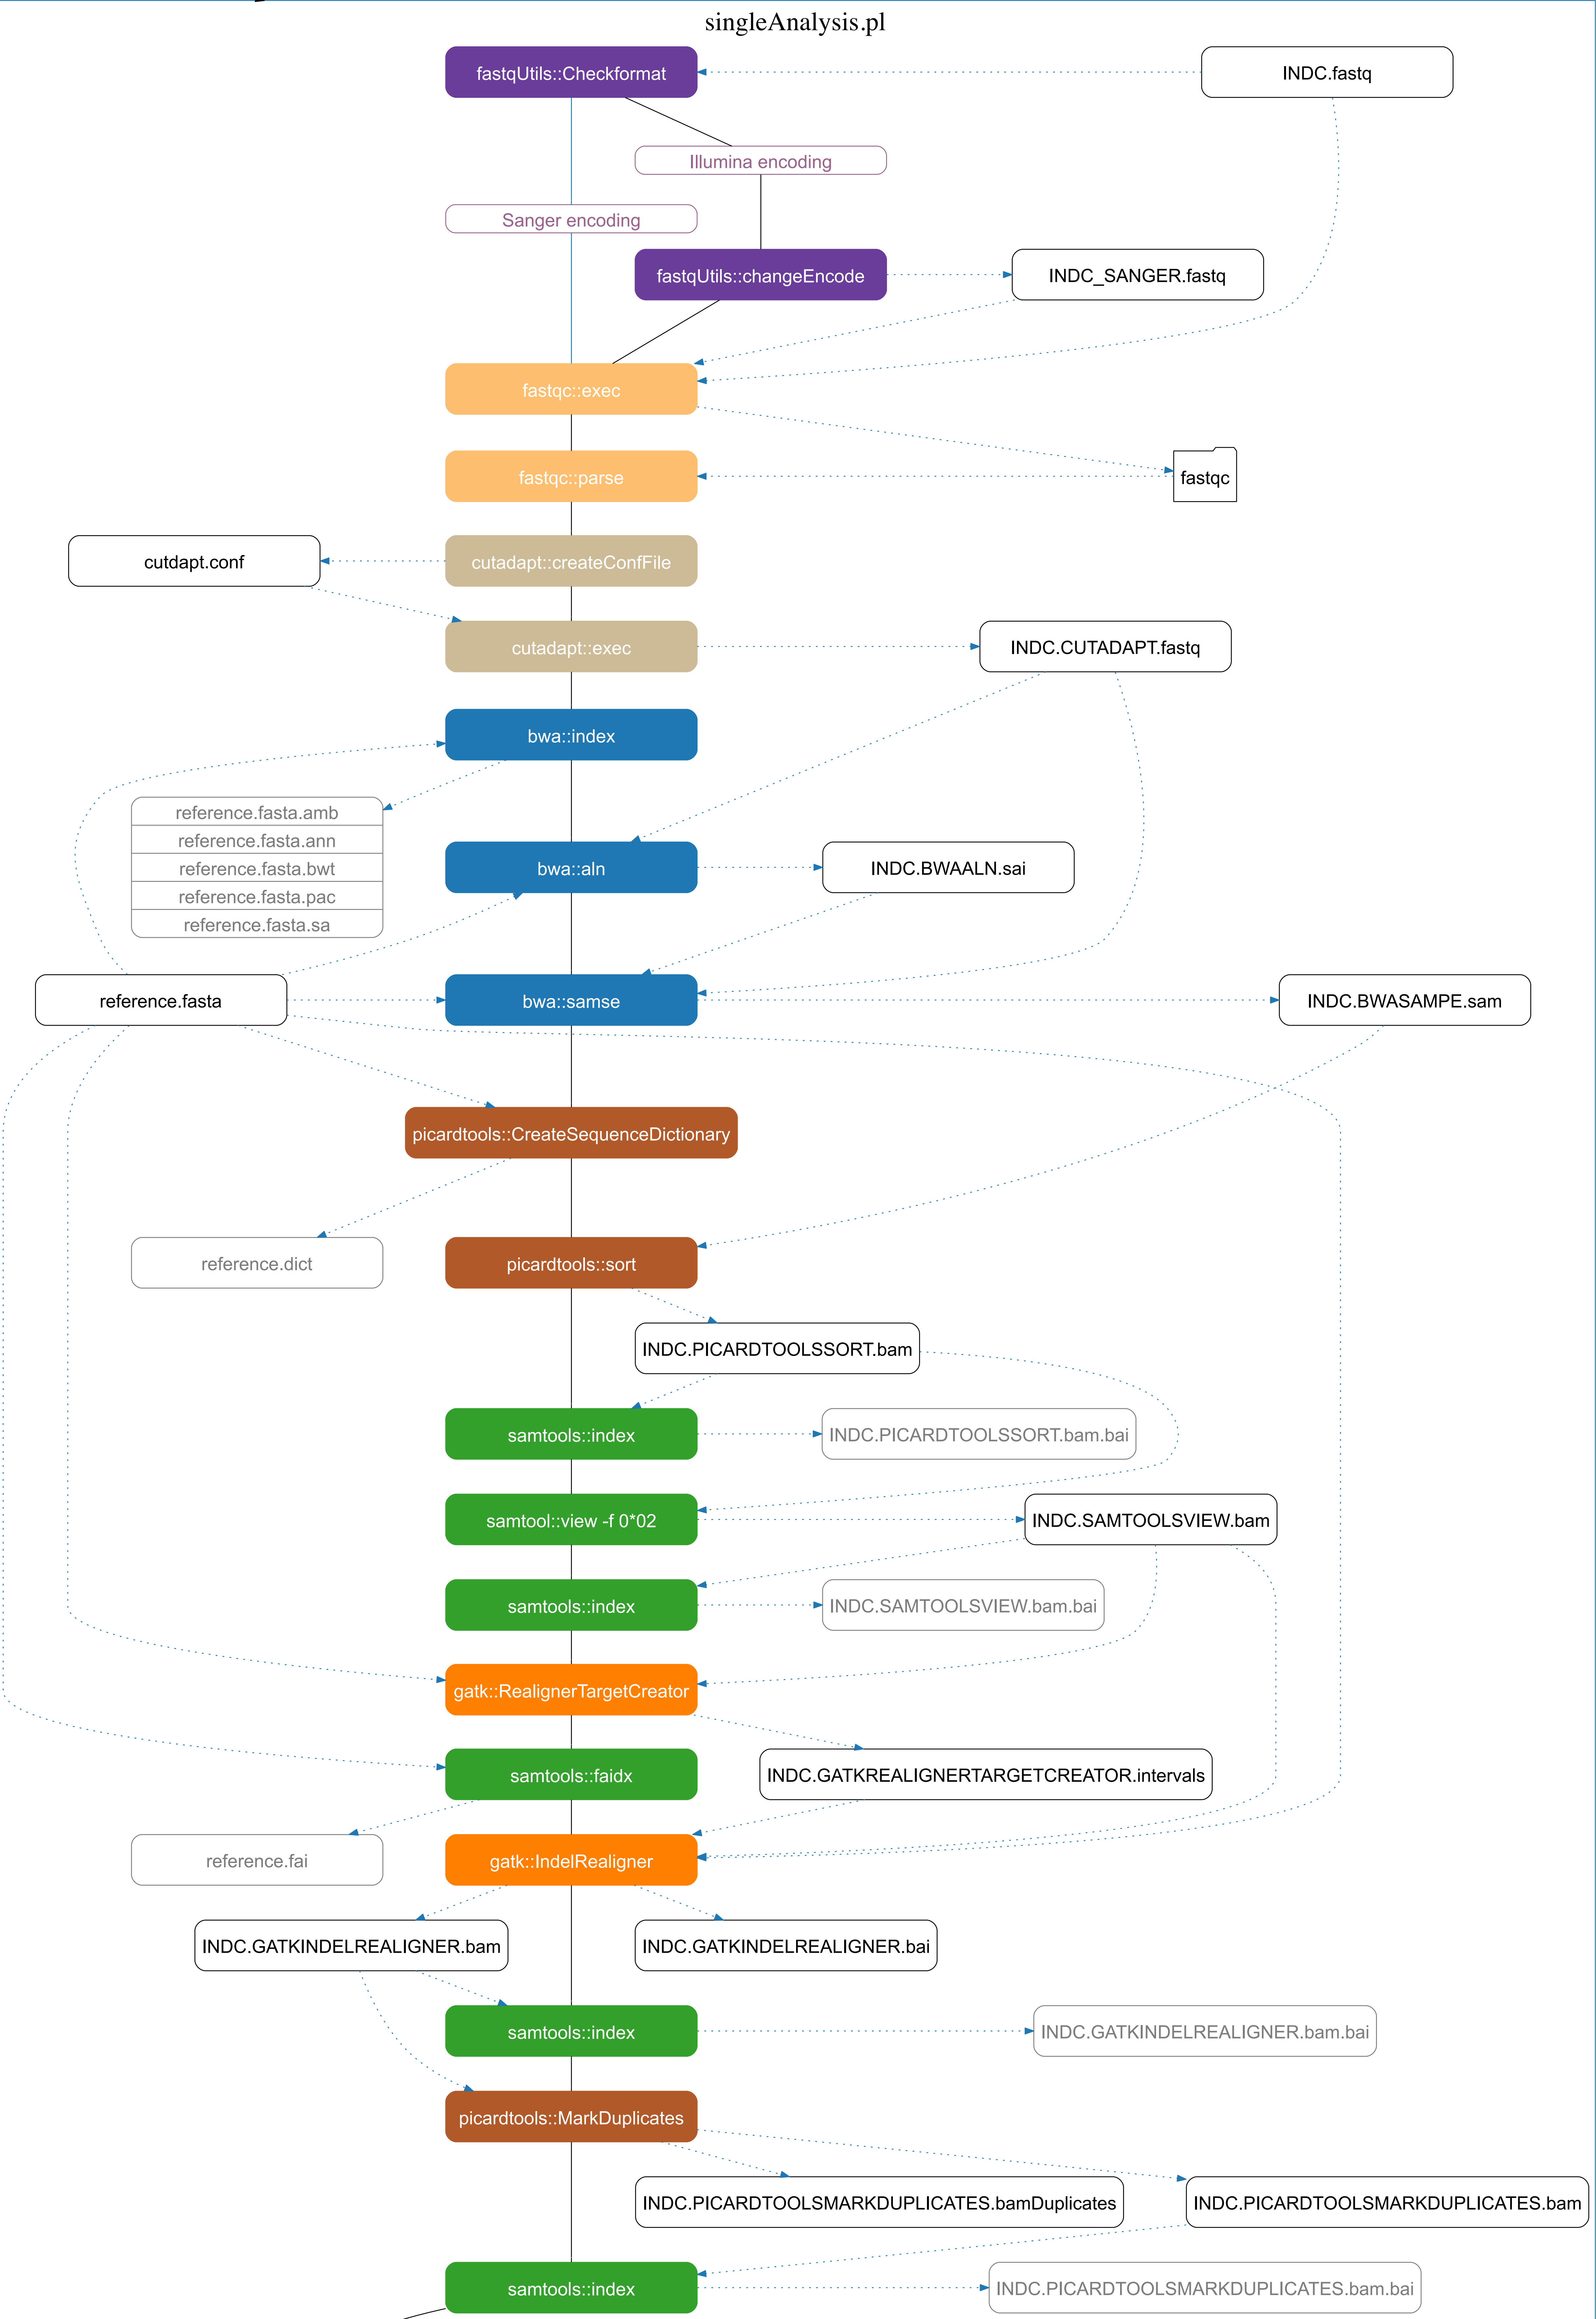

samtools::MergeBam  
 samtools::index  
 gatk::HaplotypeCaller  
 gatk::VariantSelection  
 gatk::VariantFilterator  
 INDA\_paired\_mapped.vcf
